# Supplementary material for: Dpe2/phs1 revealed unique starch metabolism with three distinct phases characterized by different starch granule numbers per chloroplast, allowing insights into the control mechanism of granule number regulation by gene co-regulation and metabolic profiling
Source: Frontiers journal article supplement (doi:10.3389/fpls.2022.1039534), 2022-11-01
Supplement: Data_Sheet_1.PDF [file Data_Sheet_1.PDF]

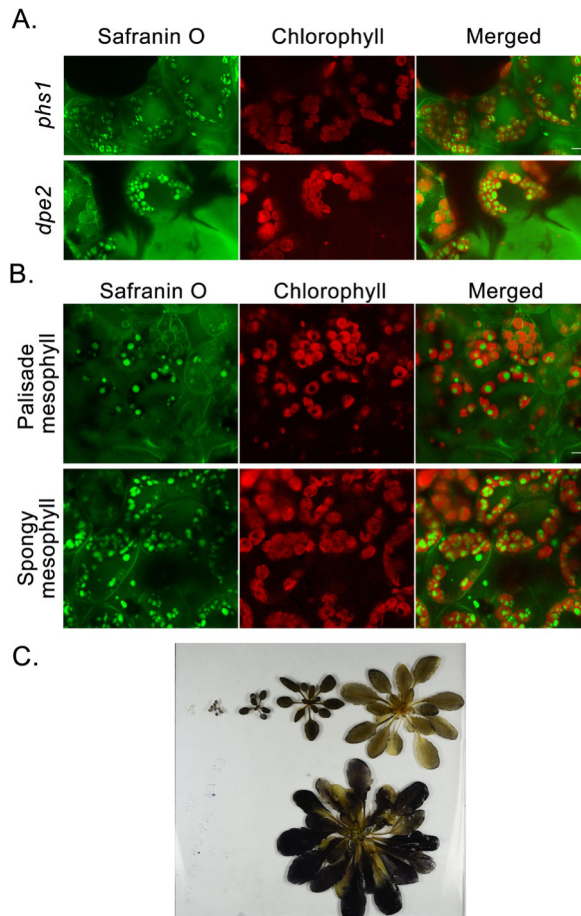

Figure S1 LCSM analysis of starch granules per chloroplast. **(A)** Both *phs1* and *dpe2* showed normal starch granule numbers per chloroplast. **(B)** LCSM analysis of *dpe2/phs1* within the same leaf between the Prior and Reduced Granule Number Periods (RGN). Leaves were taken from four-week-old rosettes in the middle of the light period. Bar = 5  $\mu$ m. **(C)** Semi-quantitative starch determination of Col-0. Shoots harvested at the EOD from two to seven weeks, decolorized shoots were stained with iodine solution.

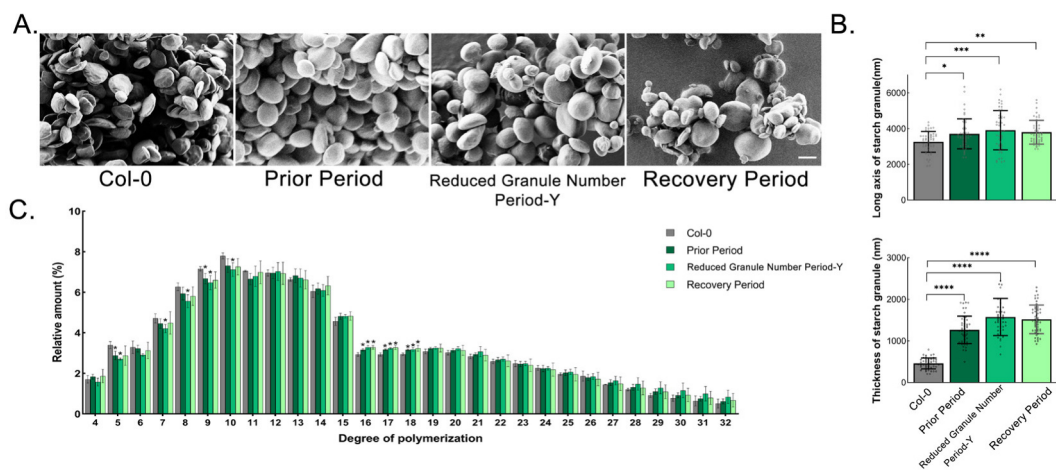

Figure S2 Starch granule characteristics of Col-0 and the different periods of *dpe2/phs1*: **(A)** SEM analysis. Starch granules were isolated from leaves harvested at the end of the light phase. Bars = 2  $\mu$ m; **(B)** Long axis and thickness of starch granules. Mean values and SD are shown,  $n = 50$ ; **(C)** Chain length distribution of starch granules. All values are mean  $\pm$  SD ( $n = 3$ ). Asterisks show the significant differences between Col-0 and the different periods of *dpe2/phs1*: \*,  $p < 0.05$ ; \*\*,  $p < 0.01$ ; and \*\*\*,  $p < 0.001$ ; based on t-tests for both B and C.

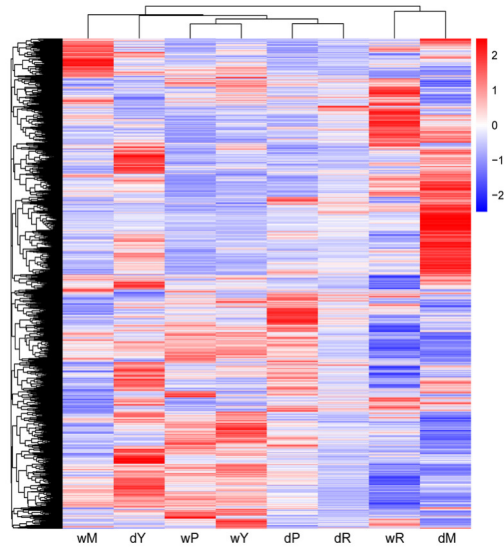

Figure S3 Heatmap plot of differential expression in the three periods for *dpe2/phs1* and the wild-type control, respectively. Heatmap shows significantly (adjusted  $P$  value  $< 0.05$ ) differentially expressed genes across eight groups. Differentially expressed gene values in each row were transformed according to  $\log_2(\text{FPKM}+1)$  (blue, low expression; red, high expression). W, wild-type; d, double mutant *dpe2/phs1*.

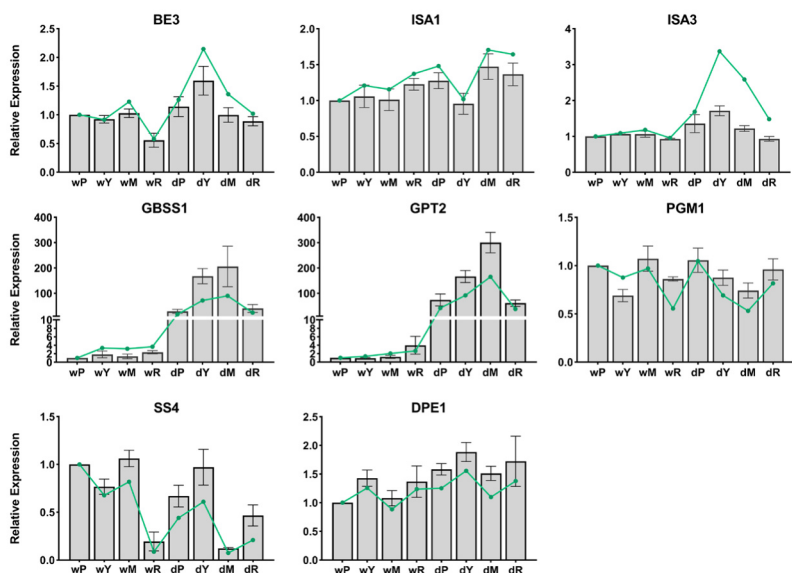

Figure S4 qRT-PCR validation of the expression levels of eight starch-related genes. The comparison between RNA-Seq data (grey bar) and qRT-PCR data (green line) is shown. Mean values  $\pm$  SD of three replicates are shown in the qRT-PCR data. Actin was used as an internal control. The RNA-Seq results were normalized based on  $\log_2$ FPKM. Both methods agreed with each other, showing similar gene expression tendencies. The abbreviations for the starch metabolism-related genes are given in Table S1.

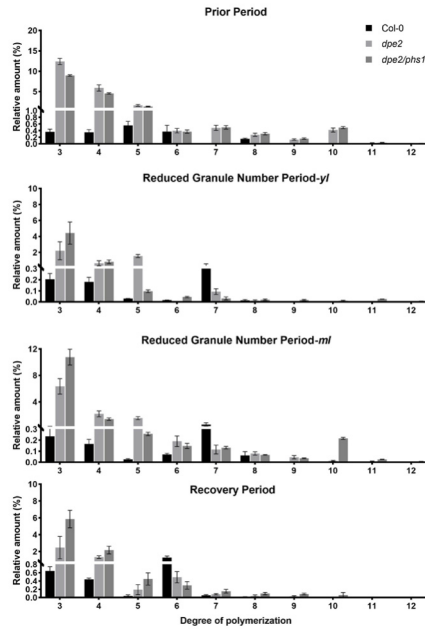

Figure S5 Relative amount of maltodextrin in the three periods. Rosettes were harvested at 3, 5, and 6 weeks, respectively. CE-LIF was used to analyze the relative amount of maltodextrin.

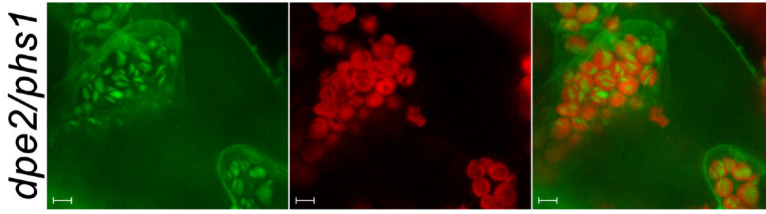

Figure S6 LSM analysis of starch granules in chloroplasts of *dpe2/phs1* grown under continuous light. Leaves were taken from 2-week-old rosettes of the mutant. Bar = 5  $\mu\text{m}$ .

Table S1 The abbreviations for the starch metabolism related genes in this study

| Gene name   | Group            | Enzyme                                | Locus     |
|-------------|------------------|---------------------------------------|-----------|
| PGI1 (PGI)  | Starch Synthesis | Phosphoglucosomerase                  | At4g24620 |
| PGM1 (PGM)  |                  | Phosphoglucotomutase                  | At5g51820 |
| APS1 (ADG1) |                  | AGPase small subunit 1                | At5g48300 |
| APS2        |                  | AGPase small subunit-like 2           | At1g05610 |
| APL1 (ADG2) |                  | AGPase large subunit 1                | At5g19220 |
| APL2        |                  | AGPase large subunit 2                | At1g27680 |
| APL3        |                  | AGPase large subunit 3                | At4g39210 |
| APL4        |                  | AGPase large subunit 4                | At2g21590 |
| GBSS1       |                  | Granule-bound starch synthase 1       | At1g32900 |
| SS1         |                  | Soluble starch synthase 1             | At5g24300 |
| SS2         |                  | Soluble starch synthase 2             | At3g01180 |
| SS3         |                  | Soluble starch synthase 3             | At1g11720 |
| SS4         |                  | Soluble starch synthase 4             | At4g18240 |
| SS5         |                  | Soluble starch synthase 5             | AT5G65685 |
| MFP1        |                  | MAR-binding filament-like protein 1   | AT3G16000 |
| MRC         |                  | myosin-resembling chloroplast protein | AT4G32190 |
| PTST        |                  | Protein targeting to starch           | AT5G39790 |
| PTST3       |                  | Protein targeting to starch 3         | AT5G03420 |
| PTST2       |                  | Protein targeting to starch 2         | AT1G27070 |
| BE1         |                  | Starch branching enzyme 1             | At3g20440 |
| BE2         |                  | Starch branching enzyme 2             | At5g03650 |
| BE3         |                  | Starch branching enzyme 3             | At2g36390 |
| GWD1 (SEX1) | Starch Breakdown | Glucan, water dikinase 1              | At1g10760 |
| LDA (PU1)   |                  | Limit dextrinase                      | At5g04360 |
| ISA1        |                  | Isoamylase 1                          | At2g39930 |
| ISA2        |                  | Isoamylase 2                          | At1g03310 |
| GWD2        |                  | Glucan, water dikinase 2              | At4g24450 |
| PWD (GWD3)  |                  | Phosphoglucan, water dikinase         | At5g26570 |
| SEX4        |                  | Starch excess 4                       | At3g52180 |
| LSF2        |                  | Like Sex Four 2                       | At3g10940 |
| LSF1        |                  | Like Sex Four 1                       | At3g01510 |
| BAM1        |                  | beta-Amylase 1                        | At3g23920 |
| BAM2        |                  | beta-Amylase 2                        | At4g00490 |
| BAM3        |                  | beta-Amylase 3                        | At4g17090 |
| BAM4        |                  | beta-Amylase 4                        | At5g55700 |
| BAM5        |                  | beta-Amylase 5                        | At4g15210 |
| BAM6        |                  | beta-Amylase 6                        | At2g32290 |
| BAM7        |                  | beta-Amylase 7                        | At2g45880 |
| BAM8        |                  | beta-Amylase 8                        | At5g45300 |
| BAM9        |                  | beta-Amylase 9                        | At5g18670 |
| AMY1        |                  | alpha-Amylase 1                       | At4g25000 |

|             |                 |                                                            |           |
|-------------|-----------------|------------------------------------------------------------|-----------|
| AMY2        |                 | alpha-Amylase 2                                            | At1g76130 |
| AMY3        |                 | alpha-Amylase 3                                            | At1g69830 |
| ISA3        |                 | Isoamylase 3                                               | At4g09020 |
| PHS1        |                 | Glucan phosphorylase1                                      | At3g29320 |
| PHS2        |                 | Glucan phosphorylase2                                      | At3g46970 |
| DPE1        |                 | Disproportionating enzyme1                                 | At5g64860 |
| DPE2        |                 | Disproportionating enzyme2                                 | At2g40840 |
| PGIC        |                 | Phosphoglucoisomerase                                      | At5g42740 |
| PGM2        |                 | Phosphoglucomutase2                                        | At1g70730 |
| PGM3        |                 | Phosphoglucomutase3                                        | At1g23190 |
| PGML1       |                 | Phosphoglucomutase-like1                                   | At1g70820 |
| PGML2       |                 | Phosphoglucomutase-like2                                   | At4g11570 |
| PGML3       |                 | Phosphoglucomutase-like3                                   | At5g17530 |
| AtGPT1      |                 | 6-phosphate/phosphate translocator1                        | At5g54800 |
| AtGPT2      |                 | 6-phosphate/phosphate translocator2                        | At1g61800 |
| AtGPT2-like |                 | glucose 6 phosphate/phosphate<br>translocator-like protein | At5g17630 |
| TPT (TPT1)  | Sugar transport | phosphate/triose-phosphate translocator<br>precursor       | At5g46110 |
| PPT1        |                 | phosphate/phosphoenolpyruvate<br>translocator precursor    | At5g33320 |
| PPT2        |                 | putative phosphate/phosphoenolpyruvate<br>translocator     | At3g01550 |



Table S2 Gene sets enriched in dY compared to dP. 9 gene sets are significant at FDR < 25%, with 8 sets up-regulated and 1 set down-regulated in dY.

### Up-regulated gene sets in dY

| NAME                                                            | SIZE | ES       | NES      | NOM p | FDR      |
|-----------------------------------------------------------------|------|----------|----------|-------|----------|
| TROPANE PIPERIDINE AND PYRIDINE ALKALOID BIOSYNTHESIS(ATH00960) | 34   | -0.413   | -1.40003 | 0     | 0.162197 |
| STEROID BIOSYNTHESIS(ATH00100)                                  | 35   | -0.39153 | -1.40959 | 0     | 0.175942 |
| GALACTOSE METABOLISM(ATH00052)                                  | 57   | -0.49128 | -1.46078 | 0     | 0.176432 |
| ARACHIDONIC ACID METABOLISM(ATH00590)                           | 16   | -0.58163 | -1.3707  | 0     | 0.179975 |
| CYANOAMINO ACID METABOLISM(ATH00460)                            | 65   | -0.4611  | -1.37909 | 0     | 0.190469 |
| ETHER LIPID METABOLISM(ATH00565)                                | 26   | -0.57869 | -1.34688 | 0     | 0.199318 |
| MAPK SIGNALING PATHWAY PLANT(ATH04016)                          | 132  | -0.52479 | -1.34712 | 0     | 0.217732 |
| BASAL TRANSCRIPTION FACTORS(ATH03022)                           | 55   | -0.54215 | -1.3479  | 0     | 0.241408 |

### Down-regulated gene sets in dY

| NAME                        | SIZE | ES       | NES      | NOM p | FDR   |
|-----------------------------|------|----------|----------|-------|-------|
| SULFUR METABOLISM(ATH00920) | 42   | 0.553634 | 1.578908 | 0     | 0.052 |

Table S3 Gene sets enriched in dY compared to dR. No gene set is significant at FDR < 25%. Pathways marked in red color are also identified when dY is compared to dP.

Up-regulated gene sets in dY

| NAME                                                   | SIZE | ES       | NES      | NOM<br>p | FDR      |
|--------------------------------------------------------|------|----------|----------|----------|----------|
| FLAVONOID BIOSYNTHESIS(ATH00941)                       | 21   | 0.652412 | 1.471937 | 0        | 0.510483 |
| SPHINGOLIPID METABOLISM(ATH00600)                      | 27   | 0.674554 | 1.44978  | 0        | 0.368014 |
| HOMOLOGOUS RECOMBINATION(ATH03440)                     | 65   | 0.623518 | 1.314947 | 0        | 0.73747  |
| NUCLEOTIDE EXCISION REPAIR(ATH03420)                   | 69   | 0.518342 | 1.303449 | 0        | 0.648946 |
| UBIQUITIN MEDIATED PROTEOLYSIS(ATH04120)               | 153  | 0.548055 | 1.282205 | 0        | 0.663912 |
| INOSITOL PHOSPHATE METABOLISM(ATH00562)                | 74   | 0.482839 | 1.266197 | 0        | 0.674823 |
| PLANT HORMONE SIGNAL<br>TRANSDUCTION(ATH04075)         | 273  | 0.328057 | 1.265199 | 0        | 0.60247  |
| AUTOPHAGY OTHER(ATH04136)                              | 40   | 0.654511 | 1.242616 | 0        | 0.582728 |
| <b>BASAL TRANSCRIPTION FACTORS(ATH03022)</b>           | 55   | 0.636561 | 1.213176 | 0        | 0.503784 |
| ENDOCYTOSIS(ATH04144)                                  | 145  | 0.432642 | 1.209341 | 0        | 0.488744 |
| VALINE LEUCINE AND ISOLEUCINE<br>DEGRADATION(ATH00280) | 49   | 0.358606 | 1.195963 | 0        | 0.506403 |
| <b>MAPK SIGNALING PATHWAY PLANT(ATH04016)</b>          | 132  | 0.349692 | 1.167332 | 0        | 0.506405 |

Down-regulated gene sets in dY

| NAME                                                            | SIZE | ES       | NES      | NOM<br>p | FDR      |
|-----------------------------------------------------------------|------|----------|----------|----------|----------|
| NITROGEN METABOLISM(ATH00910)                                   | 42   | -0.4926  | -1.41321 | 0        | 0.891131 |
| <b>SULFUR METABOLISM(ATH00920)</b>                              | 42   | -0.51413 | -1.34572 | 0        | 1        |
| PHOTOSYNTHESIS(ATH00195)                                        | 75   | -0.7052  | -1.33434 | 0        | 0.78618  |
| PENTOSE AND GLUCURONATE<br>INTERCONVERSIONS(ATH00040)           | 96   | -0.48573 | -1.31406 | 0        | 0.721116 |
| 2 OXOCARBOXYLIC ACID METABOLISM(ATH01210)                       | 71   | -0.69275 | -1.28064 | 0        | 0.553171 |
| PORPHYRIN AND CHLOROPHYLL<br>METABOLISM(ATH00860)               | 52   | -0.60004 | -1.272   | 0        | 0.539803 |
| CYSTEINE AND METHIONINE<br>METABOLISM(ATH00270)                 | 119  | -0.39915 | -1.25682 | 0        | 0.49996  |
| PHENYLALANINE TYROSINE AND TRYPTOPHAN<br>BIOSYNTHESIS(ATH00400) | 53   | -0.44844 | -1.22244 | 0        | 0.514477 |
| PHAGOSOME(ATH04145)                                             | 76   | -0.46903 | -1.21778 | 0        | 0.496866 |
| VALINE LEUCINE AND ISOLEUCINE<br>BIOSYNTHESIS(ATH00290)         | 20   | -0.83347 | -1.20717 | 0        | 0.530411 |
| GLUTATHIONE METABOLISM(ATH00480)                                | 102  | -0.30217 | -1.20373 | 0        | 0.510907 |
| PHOTOSYNTHESIS ANTENNA<br>PROTEINS(ATH00196)                    | 21   | -0.90896 | -1.20119 | 0        | 0.49728  |
| PYRIMIDINE METABOLISM(ATH00240)                                 | 58   | -0.31551 | -1.1884  | 0        | 0.491552 |
| GLUCOSINOLATE BIOSYNTHESIS(ATH00966)                            | 24   | -0.86437 | -1.18308 | 0        | 0.49051  |

Table S4 Primers used for qRT-PCR

| Name  | Primer1                  | Primer2                  |
|-------|--------------------------|--------------------------|
| BE3   | ACCGTATCGGTTGCTCTGTTCC   | CTATCGTCGTGCCTTCCATCAG   |
| ISA1  | TCCCTCATGGTTTCCCAAGGTG   | TGGCAATACGTGTTGTTGTTTCCC |
| ISA3  | GGAATGGGATGTACCGGGATGATG | CTTTCATGCCACTGTCACCCTTG  |
| GBSS1 | ACCAAGACTTCTCCTGGAAGGG   | GCTTCACTTCCCGCCACATTAAG  |
| GPT2  | TCTATTGCCGTGGAAGGTCCTC   | ACTTTGTGCCACTACCCACCAG   |
| PGM1  | ATTTCCGTGCTGGTCCTAAGGG   | TTCTCGGCAACACGATCAAGAGC  |
| SS4   | GAGTCAAGACGGCCTTTGGTTG   | TATGTGGAACCGGGCTAGAACC   |
| DPE1  | ACGCGCACAGGACTTGTATGAC   | ACCATGGCAACTTTCGCTTCAG   |
